# Supplementary material for: Social avoidance and distress in eczema patients based on a health ecology model: a cross-sectional survey study
Source: Research Square preprint supplement (doi:10.21203/rs.3.rs-7811981/v1), 2025-11-20
Supplement: Supplementary file 1 [file ae71c2db25e1306273ab4eb5.docx]

| Table 1. Scores of social avoidance and distress, perceived social support, stigma, sense of personal mastery and economic toxicity(N=323, (mean±SD) ) | | | |
| --- | --- | --- | --- |
| Item | Dimensional score | Average of entries | Ranking |
| Social avoidance and distress total score | 19.00±7.04 | 0.76±0.43 | — |
| Social avoidance | 9.67±3.66 | 0.77±0.42 | 1 |
| Social anxiety | 9.33±3.66 | 0.75±0.43 | 2 |
| Perceived social support | 44.78±21.26 | 3.72±1.79 | — |
| Family support | 15.12±7.23 | 3.92±1.73 | 1 |
| Friends support | 14.85±7.31 | 3.76±1.83 | 3 |
| Other Support | 14.81±7.23 | 3.77±1.84 | 2 |
| Stigma | 71.79±17.48 | 2.99±0.73 | — |
| Sense of social exclusion | 27.01±6.86 | 3.00±0.76 | 1 |
| Economic discrimination | 8.73±2.42 | 2.91±0.81 | 3 |
| Inner sense of shame | 14.81±3.99 | 2.96±0.80 | 2 |
| Social isolation | 20.99±5.54 | 3.00±0.79 | 1 |
| Sense of personal mastery | 17.60±7.20 | 2.51±1.03 | — |
| Economic toxicity | 13.77±9.77 | 1.25±0.89 | — |
| Positive wealth status | 4.61±3.32 | 1.15±0.83 | 2 |
| Negative psychological reactions | 9.17±6.71 | 1.31±0.96 | 1 |

Table 2.Sociodemographic characteristics and the scores of social avoidance and distress in patients with eczema (N =323).

| Variables | *n* | % | Social avoidance and distress (mean±SD) | *t/F* value | *P* value |
| --- | --- | --- | --- | --- | --- |
| Gender |  |  |  | 5.729 | ＜0.001 |
| Male | 138 | 42.7 | 16.52±6.96 |  |  |
| Female | 185 | 57.3 | 20.85±6.53 |  |  |
| Age, years |  |  |  | 0.506 | 0.603 |
| ＜35 | 139 | 43.0 | 18.65±7.31 |  |  |
| 35～＜60 | 130 | 40.2 | 19.05±6.83 |  |  |
| ≥60 | 54 | 16.7 | 19.78±6.88 |  |  |
| Marital status |  |  |  | 0.093 | 0.964 |
| Married | 177 | 54.8 | 18.99±6.98 |  |  |
| Unmarried | 120 | 37.2 | 18.96±7.14 |  |  |
| Divorced or separated | 16 | 5.0 | 18.69±7.48 |  |  |
| Widowed | 10 | 3.1 | 20.10±7.19 |  |  |
| Educational attainment |  |  |  | 310.665 | ＜0.001 |
| Primary school and below | 74 | 22.9 | 26.73±1.17 |  |  |
| Lower secondary school | 55 | 17.0 | 26.64±1.39 |  |  |
| Upper secondary school | 66 | 20.4 | 13.88±3.96 |  |  |
| College diploma | 79 | 24.5 | 13.94±3.94 |  |  |
| Bachelor's degree and above | 49 | 15.2 | 13.82±4.12 |  |  |
| Place of residence |  |  |  | 0.281 | 0.779 |
| Town/city | 261 | 80.8 | 19.05±6.93 |  |  |
| Rural area | 62 | 19.2 | 18.77±7.53 |  |  |
| Living arrangements |  |  |  | 0.641 | 0.522 |
| Living alone | 95 | 29.4 | 19.39±6.89 |  |  |
| Not living alone | 228 | 70.6 | 18.84±7.11 |  |  |
| Average monthly household income, yuan |  |  |  | 168.224 | ＜0.001 |
| ＜3000 | 60 | 18.6 | 24.03±4.80 |  |  |
| 3000～＜5000 | 94 | 29.1 | 25.09±4.31 |  |  |
| 5000～＜8000 | 119 | 36.8 | 14.62±4.23 |  |  |
| ≥8000 | 50 | 15.5 | 11.94±4.46 |  |  |
| Methods of Payment for Medical Treatment |  |  |  | 1.423 | 0.226 |
| Urban Employee Medical Insurance | 221 | 68.4 | 18.56±7.02 |  |  |
| Rural Cooperative Medical Scheme | 52 | 16.1 | 20.73±6.93 |  |  |
| Self-funded | 24 | 7.4 | 17.83±7.11 |  |  |
| Private Health Insurance | 7 | 2.2 | 19.86±8.53 |  |  |
| Other | 19 | 5.9 | 20.53±6.62 |  |  |
| Exercise habits |  |  |  | 1.110 | 0.331 |
| Regular exercise | 112 | 34.7 | 18.44±6.41 |  |  |
| Irregular exercise | 140 | 43.3 | 19.66±7.21 |  |  |
| No exercise | 71 | 22.0 | 18.58±7.61 |  |  |
| Current employment status |  |  |  | 0.571 | 0.568 |
| In employment | 177 | 54.8 | 19.20±7.01 |  |  |
| Not in employment | 146 | 45.2 | 18.75±7.09 |  |  |
| Whether have any other chronic conditions |  |  |  | -0.104 | 0.917 |
| Yes | 228 | 70.6 | 18.97±6.23 |  |  |
| No | 95 | 29.4 | 19.06±8.72 |  |  |
| Type of eczema |  |  |  | 9.198 | ＜0.001 |
| Acute | 107 | 33.1 | 18.85±6.69 |  |  |
| Chronic | 168 | 52.0 | 20.14±7.19 |  |  |
| Subacute | 48 | 14.9 | 15.33±6.04 |  |  |
| Current Episode |  |  |  | 0.190 | 0.850 |
| First Episode | 171 | 52.9 | 19.07±6.79 |  |  |
| Recurrence | 152 | 47.1 | 18.92±7.33 |  |  |
| Duration, years |  |  |  | 8.595 | ＜0.001 |
| ＜6 months | 149 | 46.1 | 18.01±6.71 |  |  |
| 6 months to ＜1 year | 116 | 35.9 | 21.73±7.09 |  |  |
| 1 year to ＜5 years | 36 | 11.1 | 16.80±6.13 |  |  |
| 5 years to ＜10 years | 9 | 2.8 | 15.22±5.04 |  |  |
| ≥10 years | 13 | 4.0 | 14.69±5.96 |  |  |

Note: SD, standard deviation.

Table 3.The correlation between social avoidance and distress, perceived social support, stigma, sense of personal mastery and economic toxicity (N=351, *r*)

| **Item** | **The social avoidance and distress total score** | **Social avoidance** | **Social anxiety** |
| --- | --- | --- | --- |
| Perceived social support | -0.881** | -0.834** | -0.860** |
| Family support | -0.855** | -0.814** | -0.829** |
| Friends support | -0.857** | -0.809** | -0.837** |
| Other Support | -0.872** | -0.822** | -0.853** |
| Stigma | 0.711** | 0.682** | 0.685** |
| Sense of social exclusion | 0.673** | 0.648** | 0.644** |
| Economic discrimination | 0.685** | 0.656** | 0.661** |
| Inner sense of shame | 0.692** | 0.644** | 0.685** |
| Social isolation | 0.679** | 0.638** | 0.666** |
| Sense of personal mastery | -0.823** | -0.792** | -0.789** |
| Economic toxicity | -0.779** | -0.734** | -0.763** |
| Positive wealth status | -0.726** | -0.687** | -0.708** |
| Negative psychological reactions | -0.776** | -0.729** | -0.761** |

Note: ***p*＜0.01

Table4. Description table of virtual variable assignment (N=323)

| Variable | Assignment mode |
| --- | --- |
| Gender | Male =0, female =1 |
| Educational attainment | Primary school and below =1,Lower secondary school =2,Upper secondary schoo=3,College diploma=4,Bachelor's degree and above=5 |
| Average monthly household income, yuan | ＜3000 =1, 3000～＜5000 =2,5000～＜8000=3,≥8000=4 |
| Type of eczema | Taking "Infectious skin disease" as the reference object, the autoimmune skin disease =(0, 1, 0), and allergic skin disease =(0, 0, 1). |
| Duration, years | ＜6 months =1, 6 months to ＜1 year =2, 1 year to ＜5 years=3, 5 years to ＜10 years =4,and ≥10 years =5 |
| Perceived social support | Original value entry |
| Stigma | Original value entry |
| Sense of personal mastery | Original value entry |
| Economic toxicity | Original value entry |

Table5. Multiple linear regression analysis of influencing factors of social avoidance and distress in patients with eczema (N=323)

| Variable | *B* | *SE* | *β* | *t-*value | *p-*value | Tolerance | VIF |
| --- | --- | --- | --- | --- | --- | --- | --- |
| Constant | 27.656 | 1.292 | — | 21.410 | ＜0.001 | — | — |
| Gender | 1.262 | 0.308 | 0.089 | 4.095 | ＜0.001 | 0.919 | 1.088 |
| Educational attainment | -0.619 | 0.187 | -0.122 | -3.302 | ＜0.001 | 0.315 | 3.178 |
| Average monthly household income, yuan | -1.140 | 0.206 | -0.157 | -5.537 | ＜0.001 | 0.541 | 1.848 |
| Type of eczema |  |  |  |  |  |  |  |
| Chronic | -0.274 | 0.354 | -0.019 | -0.775 | 0.439 | 0.685 | 1.46 |
| Subacute | -0.178 | 0.466 | -0.009 | -0.383 | 0.702 | 0.777 | 1.287 |
| Duration, years | 0.024 | 0.164 | 0.003 | 0.145 | 0.885 | 0.779 | 1.283 |
| Perceived social support | -0.100 | 0.017 | -0.303 | -6.071 | ＜0.001 | 0.174 | 5.751 |
| Stigma | 0.075 | 0.011 | 0.185 | 6.499 | ＜0.001 | 0.532 | 1.88 |
| Sense of personal mastery | -0.176 | 0.039 | -0.18 | -4.478 | ＜0.001 | 0.268 | 3.735 |
| Economic toxicity | -0.081 | 0.027 | -0.112 | -3.035 | 0.003 | 0.316 | 3.17 |
| Note: *R=*0.930a, *R²*=0.865, adjusted *R²*=0.861, *F*=199.992, *P*＜0.01 | | | | | |  |  |
